# Supplementary material for: Application of Ion Torrent Sequencing to the Assessment of the Effect of Alkali Ballast Water Treatment on Microbial Community Diversity
Source: PubMed Central journal article supplement (PMC4164647; doi:10.1371/journal.pone.0107534), 2014-09-15
Supplement: pone.0107534.s006.pdf [file pone.0107534.s006.pdf]

**Table S1:** The number of reads and the average size obtained using Ion Torrent sequencing with the 400 chemistry for the 31 ballast water samples.

| Sample ID | Ion PGM Run        | Raw Reads | RDP Filtered Reads | Average Size |
|-----------|--------------------|-----------|--------------------|--------------|
| 25P       | First              | 19297     | 13136              | 378          |
| 26P       | First              | 16774     | 11377              | 380          |
| 27P       | First              | 17307     | 11675              | 379          |
| 28P       | First              | 25342     | 17228              | 378          |
| 30P       | First              | 18383     | 12228              | 379          |
| 31P       | First              | 24800     | 16428              | 379          |
| 32P       | First              | 23178     | 15542              | 378          |
| 33P       | First              | 27276     | 18415              | 380          |
| 45P       | First              | 27592     | 18427              | 378          |
| 46P       | First              | 17907     | 11407              | 377          |
| 47P       | First              | 22859     | 18065              | 386          |
| 48P       | First              | 21938     | 16154              | 382          |
| 49P       | First              | 24356     | 16466              | 378          |
| 50P       | First              | 23363     | 15109              | 377          |
| 51P       | First              | 27880     | 21906              | 386          |
| 52P       | First              | 27872     | 19951              | 381          |
| 35N       | Second             | 20045     | 15124              | 380          |
| 36N       | Second             | 19930     | 14687              | 379          |
| 37N       | Second             | 27853     | 20850              | 379          |
| 38N       | Second             | 28432     | 21112              | 380          |
| 40N       | Second             | 35638     | 26115              | 378          |
| 41N       | Second             | 33958     | 24849              | 378          |
| 43N       | Second             | 24184     | 18025              | 379          |
| 53N       | Second             | 35933     | 25649              | 377          |
| 54N       | Second             | 30465     | 22361              | 378          |
| 55N       | Second             | 24442     | 19260              | 384          |
| 56N       | Second             | 23941     | 19013              | 383          |
| 57N       | Second             | 34711     | 25363              | 377          |
| 58N       | Second             | 34501     | 24596              | 377          |
| 59N       | Second             | 30604     | 24575              | 383          |
| 60N       | Second             | 32384     | 25512              | 383          |
|           | Average            | 25907     | 18729              | 380          |
|           | Standard deviation | 5664      | 4610               | 3            |
