# Supplementary material for: Application of Ion Torrent Sequencing to the Assessment of the Effect of Alkali Ballast Water Treatment on Microbial Community Diversity
Source: PubMed Central journal article supplement (PMC4164647; doi:10.1371/journal.pone.0107534), 2014-09-15
Supplement: pone.0107534.s007.pdf [file pone.0107534.s007.pdf]

Table S2. Summary of diversity measurements for each sample rarefied at 10918 reads

| Sample_ID | Timing    | Treatment | Number of OTUs | Chao1  | Shannon |
|-----------|-----------|-----------|----------------|--------|---------|
| 37N       | Intake    | NaOH      | 984.2          | 1531.1 | 6.968   |
| 38N       | Intake    | NaOH      | 778.8          | 1197.0 | 6.332   |
| 43N       | Intake    | NaOH      | 674.9          | 1093.8 | 6.498   |
| 27P       | Intake    | NaOH      | 1076.5         | 1743.8 | 6.885   |
| 28P       | Intake    | NaOH      | 962.6          | 1533.4 | 7.076   |
| 32P       | Intake    | NaOH      | 1057.7         | 1785.4 | 7.006   |
| 33P       | Intake    | NaOH      | 815.8          | 1312.8 | 6.565   |
| 35N       | Intake    | Control   | 1075.3         | 1715.9 | 6.724   |
| 36N       | Intake    | Control   | 982.7          | 1538.0 | 6.983   |
| 40N       | Intake    | Control   | 1080.4         | 1604.6 | 7.332   |
| 41N       | Intake    | Control   | 1141           | 1784.8 | 7.354   |
| 25P       | Intake    | Control   | 743.4          | 1204.6 | 7.054   |
| 26P       | Intake    | Control   | 1284.2         | 2228.8 | 7.403   |
| 30P       | Intake    | Control   | 1086.3         | 1754.2 | 7.254   |
| 31P       | Intake    | Control   | 1414.4         | 2285.0 | 7.705   |
| 55N       | Discharge | NaOH      | 366.4          | 626.4  | 2.716   |
| 56N       | Discharge | NaOH      | 419            | 688.8  | 3.512   |
| 59N       | Discharge | NaOH      | 395.2          | 638.8  | 2.995   |
| 60N       | Discharge | NaOH      | 387.7          | 611.5  | 3.405   |
| 47P       | Discharge | NaOH      | 304            | 475.0  | 2.004   |
| 48P       | Discharge | NaOH      | 535.8          | 884.8  | 3.800   |
| 51P       | Discharge | NaOH      | 283.9          | 515.5  | 1.602   |
| 52P       | Discharge | NaOH      | 530.1          | 921.4  | 3.735   |
| 53N       | Discharge | Control   | 1417.9         | 2401.0 | 7.938   |
| 54N       | Discharge | Control   | 1284.5         | 2083.5 | 7.713   |
| 57N       | Discharge | Control   | 1343.7         | 2143.8 | 8.062   |
| 58N       | Discharge | Control   | 1216.9         | 1926.5 | 7.715   |
| 45P       | Discharge | Control   | 1303.5         | 2122.1 | 7.885   |
| 46P       | Discharge | Control   | 1236.8         | 1945.7 | 7.947   |
| 49P       | Discharge | Control   | 1251.8         | 1976.7 | 7.752   |
| 50P       | Discharge | Control   | 1362.8         | 2210.5 | 7.977   |
