# Supplementary material for: Application of Ion Torrent Sequencing to the Assessment of the Effect of Alkali Ballast Water Treatment on Microbial Community Diversity
Source: PubMed Central journal article supplement (PMC4164647; doi:10.1371/journal.pone.0107534), 2014-09-15
Supplement: pone.0107534.s009.pdf [file pone.0107534.s009.pdf]

Supporting Information (Table S4): Pearson correlation analysis for the RDP multiclassifier output

|          | 26P_Ion | 26P_Pyro | 28P_Ion | 28P_Pyro | 31P_Ion | 31P_Pyro | 33P_Ion | 33P_Pyro | 46P_Ion | 46P_Pyro | 48P_Ion | 48P_Pyro | 50P_Ion | 50P_Pyro | 52P_Ion | 52P_Pyro |
|----------|---------|----------|---------|----------|---------|----------|---------|----------|---------|----------|---------|----------|---------|----------|---------|----------|
| 26P_Ion  | 1.000   | 0.851    | 0.827   | 0.810    | 0.986   | 0.899    | 0.841   | 0.831    | 0.406   | 0.311    | -0.006  | -0.009   | 0.437   | 0.345    | -0.007  | -0.009   |
| 26P_Pyro | 0.851   | 1.000    | 0.493   | 0.586    | 0.797   | 0.957    | 0.520   | 0.583    | 0.189   | 0.237    | -0.006  | -0.006   | 0.204   | 0.261    | -0.006  | -0.006   |
| 28P_Ion  | 0.827   | 0.493    | 1.000   | 0.883    | 0.861   | 0.625    | 0.970   | 0.895    | 0.533   | 0.355    | -0.007  | -0.009   | 0.572   | 0.406    | -0.007  | -0.009   |
| 28P_Pyro | 0.810   | 0.586    | 0.883   | 1.000    | 0.836   | 0.720    | 0.837   | 0.973    | 0.339   | 0.404    | -0.008  | -0.009   | 0.348   | 0.430    | -0.008  | -0.009   |
| 31P_Ion  | 0.986   | 0.797    | 0.861   | 0.836    | 1.000   | 0.871    | 0.872   | 0.865    | 0.406   | 0.301    | -0.007  | -0.009   | 0.435   | 0.330    | -0.007  | -0.009   |
| 31P_Pyro | 0.899   | 0.957    | 0.625   | 0.720    | 0.871   | 1.000    | 0.632   | 0.715    | 0.277   | 0.362    | -0.007  | -0.006   | 0.292   | 0.410    | -0.007  | -0.007   |
| 33P_Ion  | 0.841   | 0.520    | 0.970   | 0.837    | 0.872   | 0.632    | 1.000   | 0.872    | 0.549   | 0.313    | -0.004  | -0.008   | 0.590   | 0.368    | -0.005  | -0.008   |
| 33P_Pyro | 0.831   | 0.583    | 0.895   | 0.973    | 0.865   | 0.715    | 0.872   | 1.000    | 0.296   | 0.296    | -0.006  | -0.007   | 0.297   | 0.320    | -0.006  | -0.007   |
| 46P_Ion  | 0.406   | 0.189    | 0.533   | 0.339    | 0.406   | 0.277    | 0.549   | 0.296    | 1.000   | 0.753    | 0.251   | 0.249    | 0.966   | 0.751    | 0.249   | 0.248    |
| 46P_Pyro | 0.311   | 0.237    | 0.355   | 0.404    | 0.301   | 0.362    | 0.313   | 0.296    | 0.753   | 1.000    | 0.460   | 0.466    | 0.684   | 0.932    | 0.460   | 0.465    |
| 48P_Ion  | -0.006  | -0.006   | -0.007  | -0.008   | -0.007  | -0.007   | -0.004  | -0.006   | 0.251   | 0.460    | 1.000   | 0.985    | 0.118   | 0.172    | 1.000   | 0.989    |
| 48P_Pyro | -0.009  | -0.006   | -0.009  | -0.009   | -0.009  | -0.006   | -0.008  | -0.007   | 0.249   | 0.466    | 0.985   | 1.000    | 0.109   | 0.174    | 0.984   | 0.999    |
| 50P_Ion  | 0.437   | 0.204    | 0.572   | 0.348    | 0.435   | 0.292    | 0.590   | 0.297    | 0.966   | 0.684    | 0.118   | 0.109    | 1.000   | 0.735    | 0.117   | 0.110    |
| 50P_Pyro | 0.345   | 0.261    | 0.406   | 0.430    | 0.330   | 0.410    | 0.368   | 0.320    | 0.751   | 0.932    | 0.172   | 0.174    | 0.735   | 1.000    | 0.172   | 0.173    |
| 52P_Ion  | -0.007  | -0.006   | -0.007  | -0.008   | -0.007  | -0.007   | -0.005  | -0.006   | 0.249   | 0.460    | 1.000   | 0.984    | 0.117   | 0.172    | 1.000   | 0.989    |
| 52P_Pyro | -0.009  | -0.006   | -0.009  | -0.009   | -0.009  | -0.007   | -0.008  | -0.007   | 0.248   | 0.465    | 0.989   | 0.999    | 0.110   | 0.173    | 0.989   | 1.000    |
